# Supplementary material for: MPST sulfurtransferase maintains mitochondrial protein import and cellular bioenergetics to attenuate obesity
Source: PubMed Central journal article supplement — J Exp Med. 2022 May 26;219(7):e20211894. doi: 10.1084/jem.20211894 (PMC9143789; doi:10.1084/jem.20211894), 2022-05-26

**Fig. S1A**

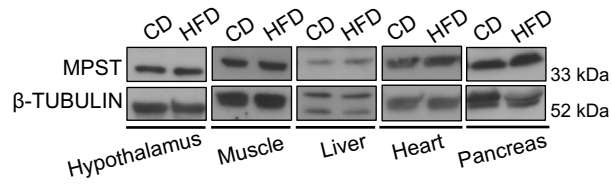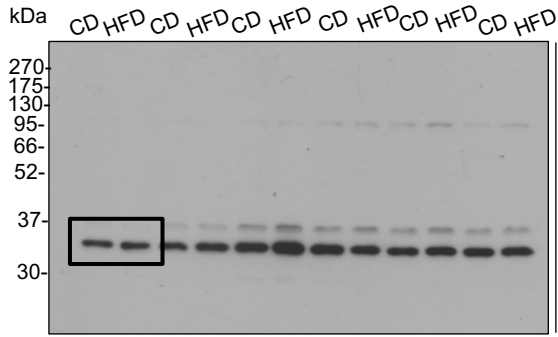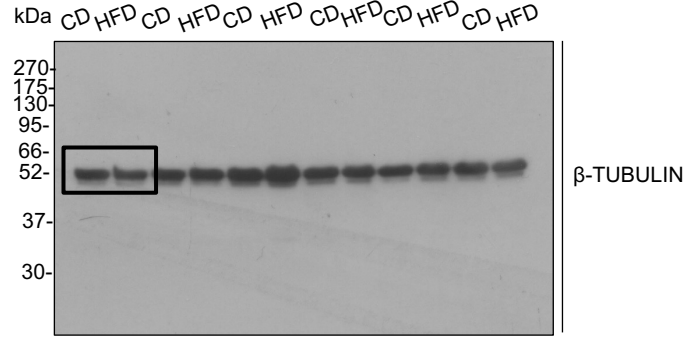

**Hypothalamus**

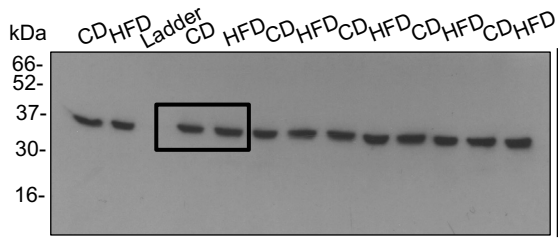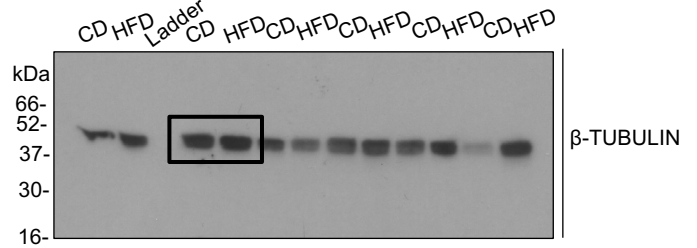

**Muscle**

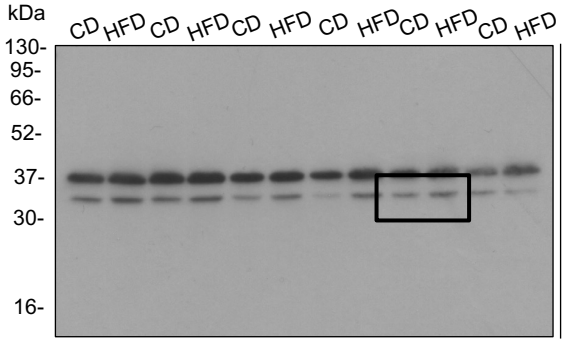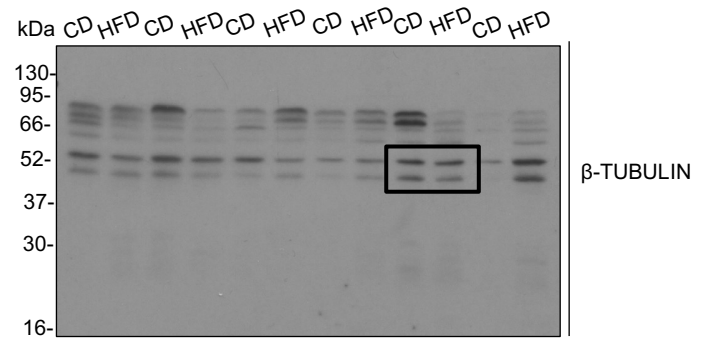

**Liver**

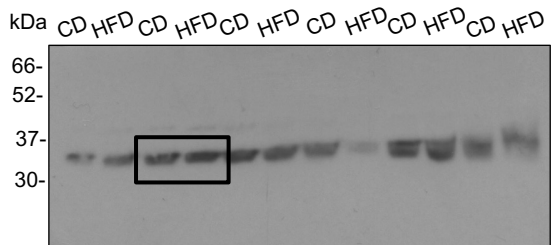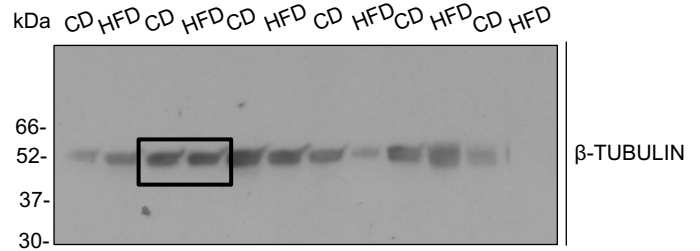

**Heart**

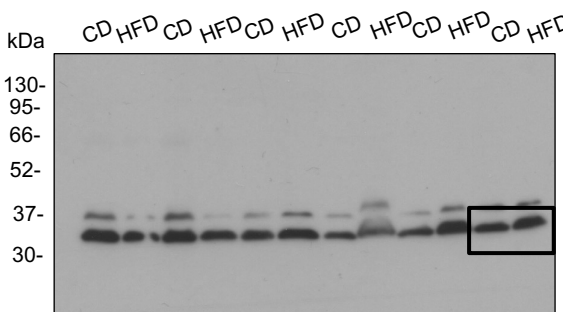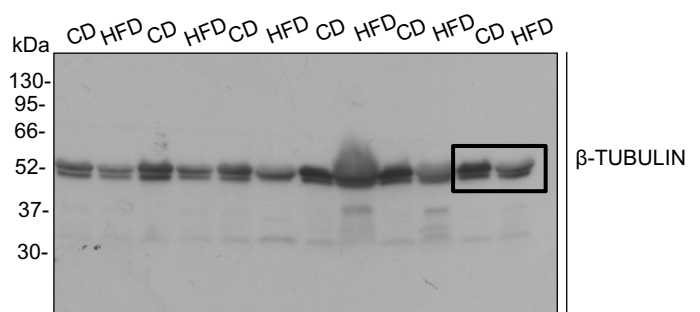

**Pancreas**

**Fig. S1B**

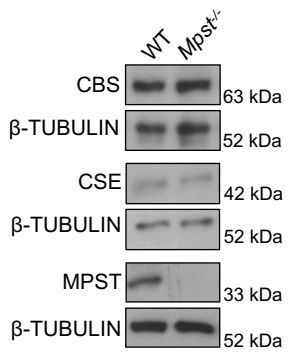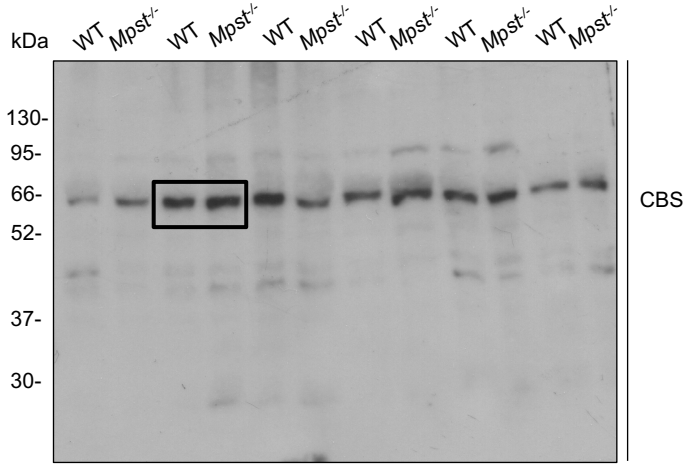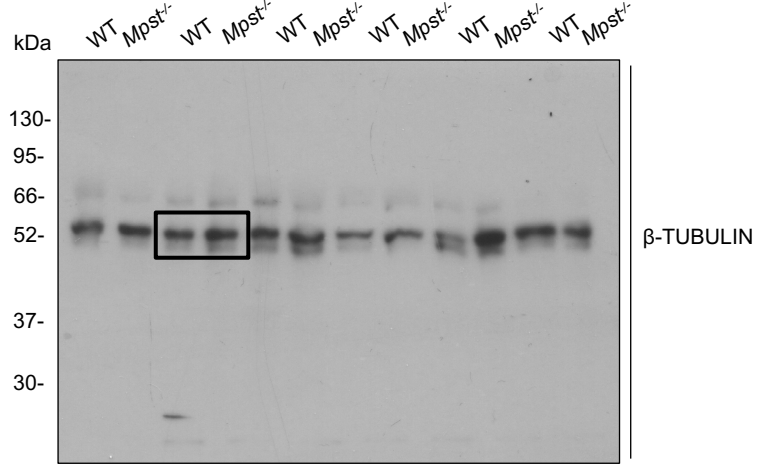

\*used for CBS quantification

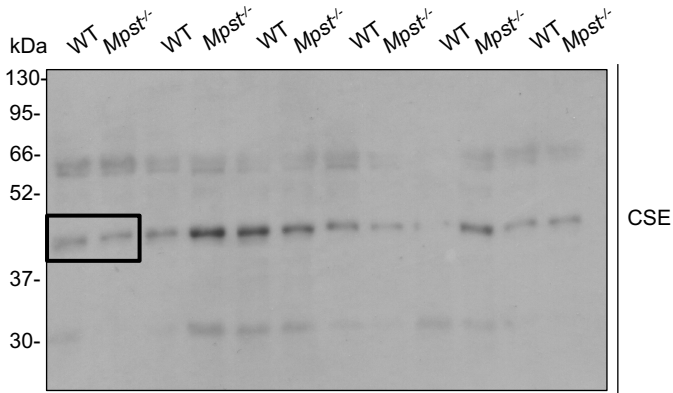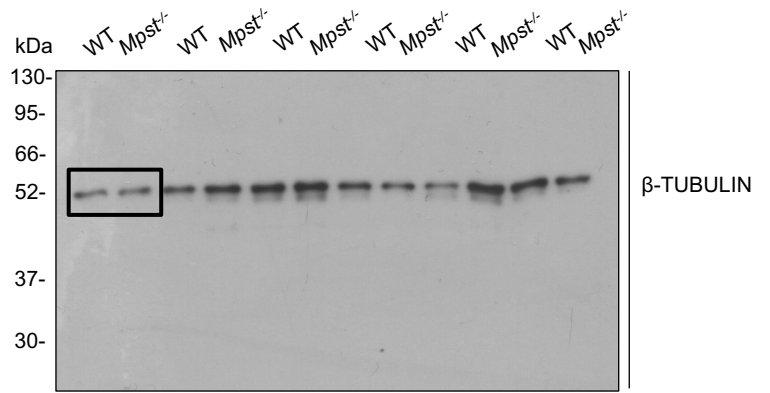

\*used for CSE quantification

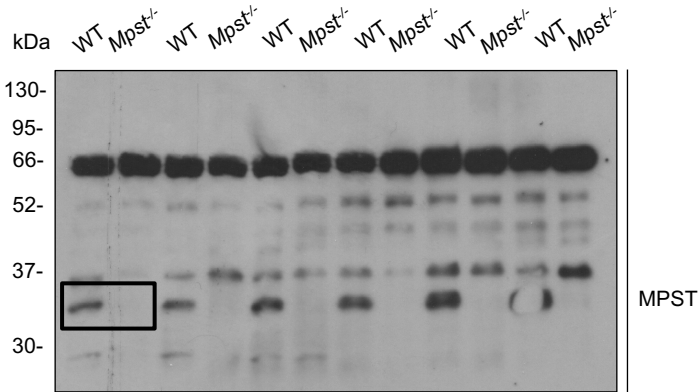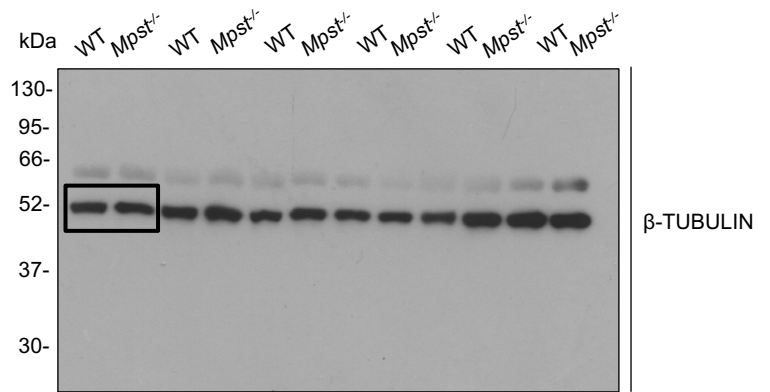

\*used for MPST quantification

**Fig. S1C**

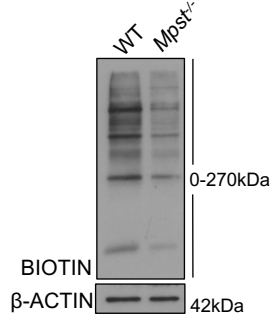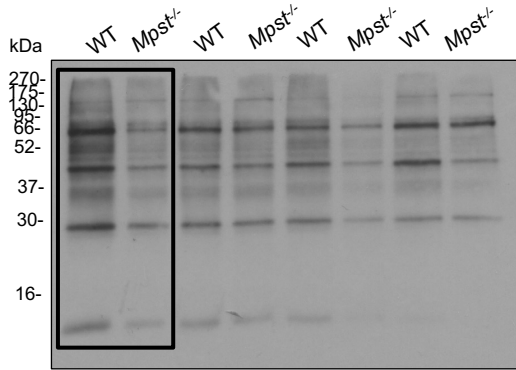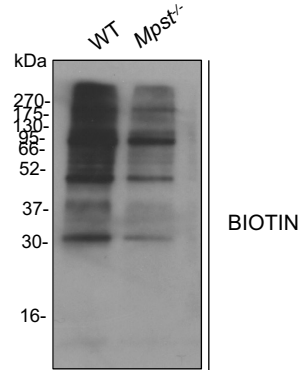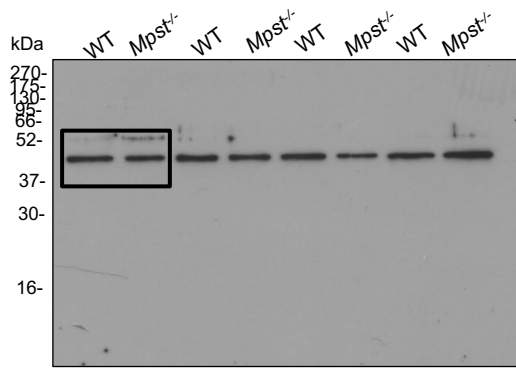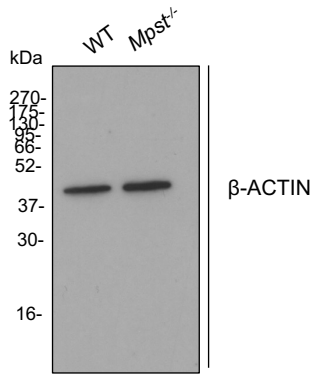

Supplement: JEM_20211894_SourceDataFS1.pdf [file JEM_20211894_SourceDataFS1.pdf]
