# Supplementary figures and images for: MPST sulfurtransferase maintains mitochondrial protein import and cellular bioenergetics to attenuate obesity
Source: PubMed Central journal article supplement — J Exp Med. 2022 May 26;219(7):e20211894. doi: 10.1084/jem.20211894 (PMC9143789; doi:10.1084/jem.20211894), 2022-05-26

**Fig. 2M**

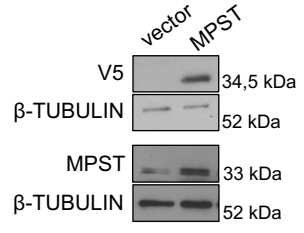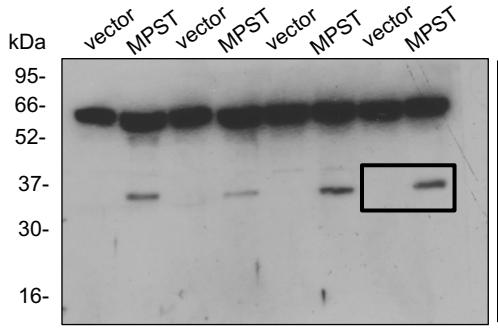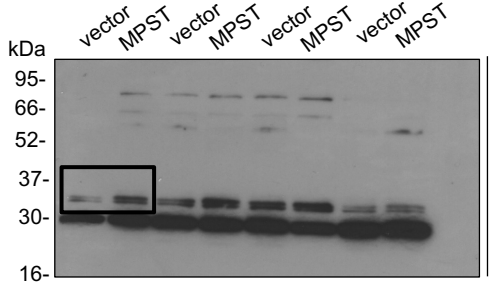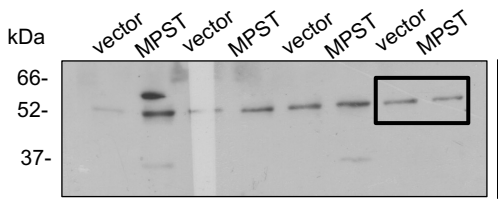

\*used for V5 quantification

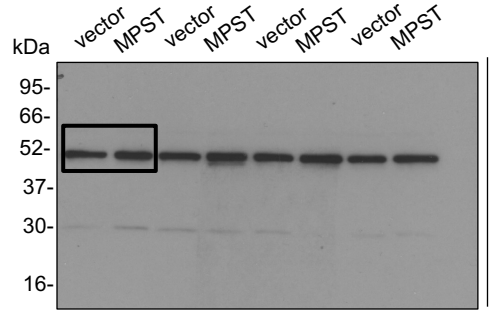

\*used for MPST quantification

Supplement: JEM_20211894_SourceDataF2.pdf [file JEM_20211894_SourceDataF2.pdf]

**Fig. 4D**

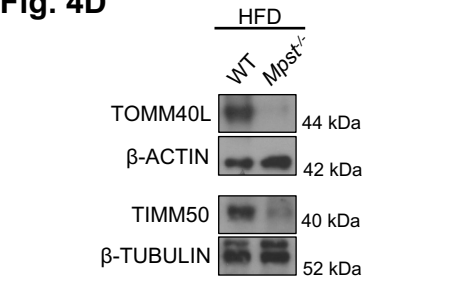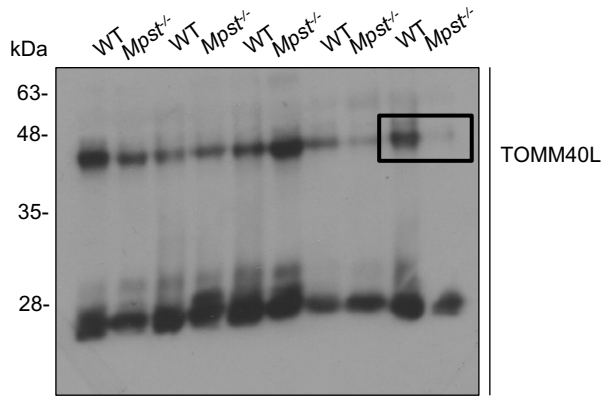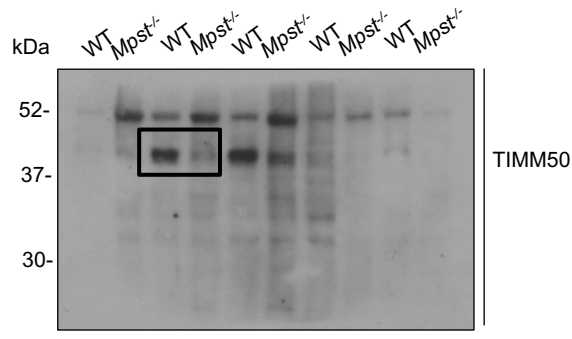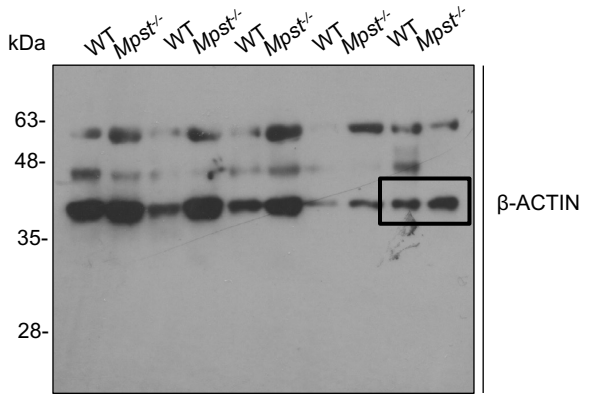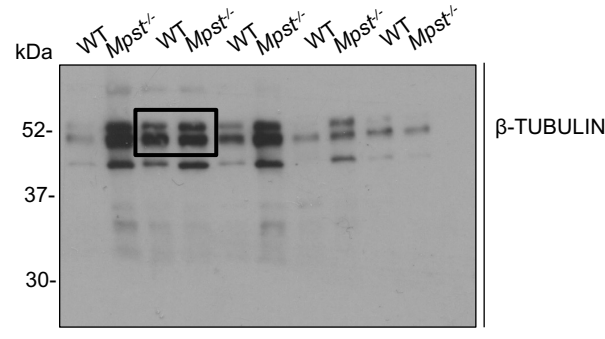

\*used for TOMM40L quantification

\*used for TIMM50 quantification

Supplement: JEM_20211894_SourceDataF4.pdf [file JEM_20211894_SourceDataF4.pdf]

**Fig. 7C**

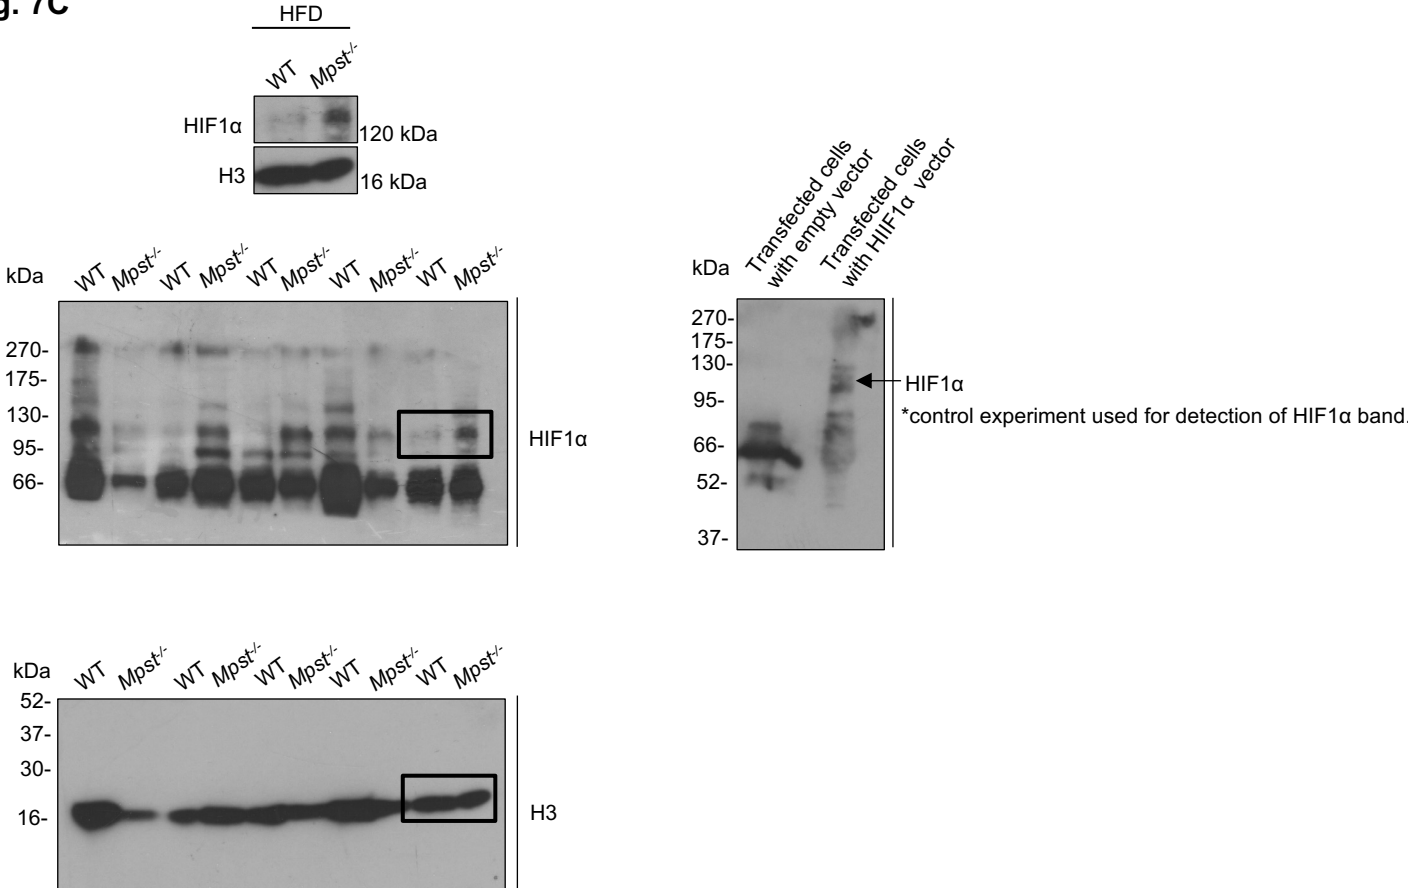

**Fig. 7G**

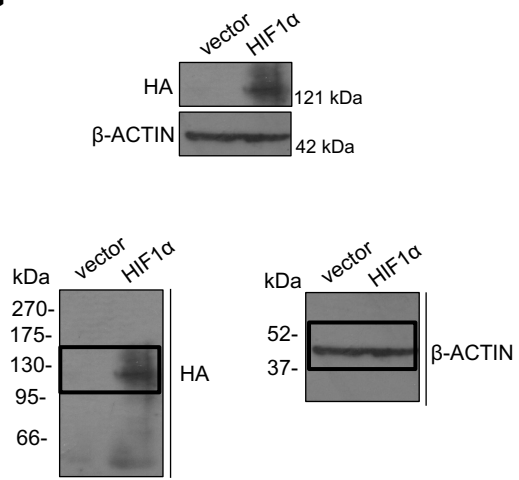

Supplement: JEM_20211894_SourceDataF7.pdf [file JEM_20211894_SourceDataF7.pdf]

**Fig. 8C**

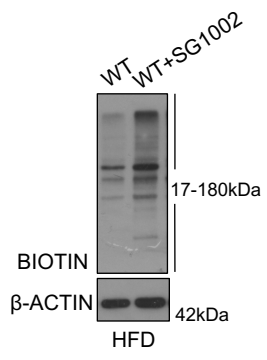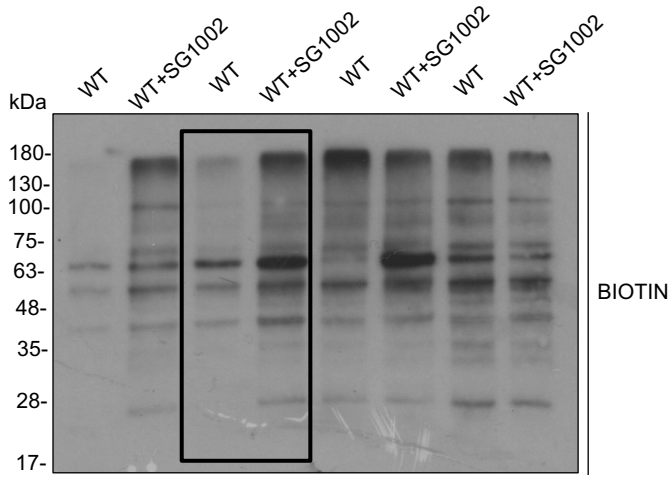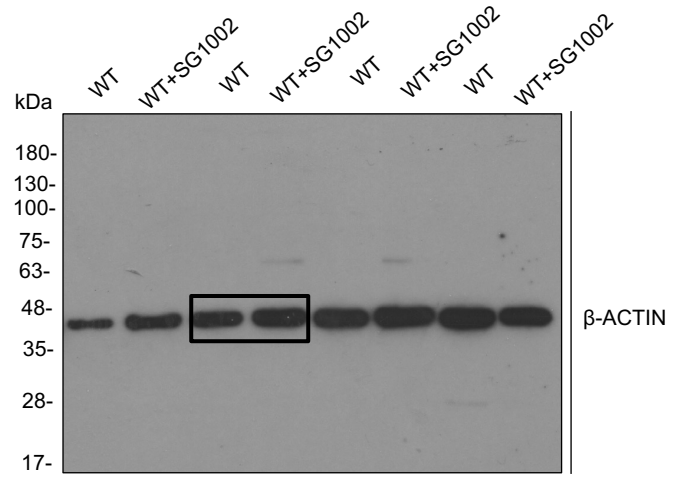

Supplement: JEM_20211894_SourceDataF8.pdf [file JEM_20211894_SourceDataF8.pdf]
